# Supplementary material for: Isolation and Characterization of APETALA3 Orthologs and Promoters from the Distylous Fagopyrum esculentum
Source: MDPI journal article supplement (doi:10.3390/plants10081644), 2021-08-10
Supplement: s1 [file s1]

## Supplementary Materials

**Table S1.** Primers used in this study.

| Primer name    | Primers sequences (5'-3')                               |
|----------------|---------------------------------------------------------|
| GSPAP3         | GAAATAGAACAAGACGTGATGGC                                 |
| DFaesAP3_2F    | ATGGCGAGGGGAAAGATCCAGATAC                               |
| DFaesAP3_2R    | GTGAGGAACCATATACAATCGGAGAC                              |
| qFaesAP3_2F    | TGATGTGTTGAGGGAGGATC                                    |
| qFaesAP3_2R    | AATCGGAGACACGAACAGCT                                    |
| qFaesAP3_2aF   | CGTGGCACAGCATTCTTTT                                     |
| qFaesAP3_2aR   | GAGACACGAACAGCTGCTAC                                    |
| qFaesactinF    | ACCTTGCTGGACGTGACCTTAC                                  |
| qFaesactinR    | CCATCAGGAAGCTCATAGTTC                                   |
| D1pAP3_1SP1    | TCCTCTTGATCTTCTGTACATCGTC                               |
| D1pAP3_1SP2    | GGAGTCGTACATCTGCTTGGTGCTAC                              |
| D1pAP3_1SP3    | GTGGTGTTGGGAGTGATGAATTCGTG                              |
| D2pAP3_1SP1    | GCGTTGATCGTCCCATTTGTTTATTC                              |
| D2pAP3_1SP2    | TCTTCTGTAATCCATTTGTCTTGCC                               |
| D2pAP3_1SP3    | CATCCACAACCACCATTTAAGTCCT                               |
| FLpAP3_2SP1    | AGGATTACGTGGTGTTGGGACTGATG                              |
| FLpAP3_2SP2    | ATCGCAGAGAACCGTGAGCTCAT                                 |
| FLpAP3_2SP3    | CTTGCTGTGGTTGCGTTCTCTATCC                               |
| 5RAP3_2GSP1    | GTGAGGAACCATATACAATC                                    |
| 5RAP3_2GSP2    | TGGTATCCAGCGCAGTCCTAGAAC                                |
| 5RAP3_2GSP3    | GTATCAATCTGATTCGCGAGTAC                                 |
| TpFaesAP3_1F   | <u>GAGCTCCGATACGACTCCTACTACGGTTC</u>                    |
| TpFaesAP3_1R   | <u>TCTAGATTTTGTTACTTGTTGTCCTTAGCAATC</u>                |
| TpFaesAP3_2F   | ATGATTACGAATTC <u>GAGCTCAGTTAAACCAGACACATTTACTCCC</u>   |
| TpFaesAP3_2R   | TCTGCAGGTCGACT <u>CTAGAAACAAAGTAGGAAGAAAACTAGGTGGAG</u> |
| TFaesAP3_2/2aF | AACACGGGGGACT <u>CTAGACCACCTTTACTCTCTCCACCTAG</u>       |
| TFaesAP3_2/2aR | TCGGGGAAATTC <u>GAGCTCTCCTAAGTAGGAACACATGCAGC</u>       |
| qTFaesAP3_2F   | GATTTGGCATCACACTTTCTACAATG                              |
| qTFaesAP3_2R   | GTATCCAGCGCAGTCCT                                       |
| qUBQ5F         | AAGACTTACACCAAGCCGAAGAAGATC                             |
| qUBQ5R         | CCAGCTCCACAGGTTGCGTTAG                                  |

**Table S2.** Information on Sequences selected for alignments and phylogenetic analyses from NCBI GenBank.

| Taxon and species           | Protein name | Accession numbers | Lineage |
|-----------------------------|--------------|-------------------|---------|
| Amborellaceae               |              |                   |         |
| <i>Amborella trichopoda</i> | AmAP3        | BAD42444.1        | AP3     |
|                             | AmPI         | BAD42443.1        | PI      |
| Nymphaeaceae                |              |                   |         |
| <i>Nymphaea tetragona</i>   | NtAP3        | BAD42348.1        | AP3     |
|                             | NtPI         | BAD42349.1        | PI      |
| Cabombaceae                 |              |                   |         |
| <i>Brasenia schreberi</i>   | BsAP3        | BAD42352.1        | AP3     |
|                             | BsPI         | BAD42353.1        | PI      |
| Aristolochiaceae            |              |                   |         |
| <i>Asarum caudigerum</i>    | AcAP3        | ACA62949.1        | AP3     |
|                             | AcAP3-D      | AGO59776.1        | AP3     |
| Magnoliaceae                |              |                   |         |
| <i>Magnolia wufengensis</i> | MAwuAP3-1    | AFM75880.1        | AP3     |
|                             | MAwuAP3-2    | AFM75881.1        | AP3     |
|                             | MAwuPI       | AFM75882.1        | PI      |
| Calycanthaceae              |              |                   |         |

|                                 |           |                |     |
|---------------------------------|-----------|----------------|-----|
| <i>Chimonanthus praecox</i>     | CpAP3     | ABK34952.1     | AP3 |
| Chloranthaceae                  |           |                |     |
| <i>Hedyosmum orientale</i>      | HoAP3-1   | AFP17801.1     | AP3 |
|                                 | HoAP3-2   | AFP17802.1     | AP3 |
|                                 | HoPI-1    | AFP17796.1     | PI  |
|                                 | HoPI-2    | AFP17799.1     | PI  |
|                                 | HoPI-3    | AFP17800.1     | PI  |
| <i>Chloranthus spicatus</i>     | CsAP3     | AAR06664.1     | AP3 |
| Liliaceae                       |           |                |     |
| <i>Lilium longiflorum</i>       | LMADS1    | AAM27456.1     | AP3 |
|                                 | LMADS8    | AEI88009.1     | PI  |
|                                 | LMADS9    | AEI88010.1     | PI  |
| Orchidaceae                     |           |                |     |
| <i>Oncidium hybrid cultivar</i> | OMADS3    | AAO45824.1     | AP3 |
|                                 | OMADS5    | ADJ67234.1     | AP3 |
|                                 | OMADS9    | ADJ67235.1     | AP3 |
|                                 | OMADS8    | ADJ67236.1     | PI  |
| <i>Cymbidium sinense</i>        | CysiAP3-1 | AUO28994.1     | AP3 |
|                                 | CysiPI    | AUO28996.1     | PI  |
| Iridaceae                       |           |                |     |
| <i>Crocus sativus</i>           | CsatAP3a  | AAY24691.1     | AP3 |
|                                 | CsatAP3b  | AAY24692.1     | AP3 |
|                                 | CsatPIc1  | ABB22780.1     | PI  |
|                                 | CsatPIc2  | ABB22781.1     | PI  |
| Zingiberaceae                   |           |                |     |
| <i>Alpinia oblongifolia</i>     | AoAP3     | ABS83561.1     | AP3 |
|                                 | AoPI      | ABB92623.1     | PI  |
| Poaceae                         |           |                |     |
| <i>Zea mays</i>                 | silky 1   | NP_001104951.1 | AP3 |
|                                 | Zmm16     | NP_001105136.1 | PI  |
|                                 | Zmm18     | CAC33849.1     | PI  |
|                                 | Zmm29     | CAC33850.1     | PI  |
| Papaveraceae                    |           |                |     |
| <i>Bocconia frutescens</i>      | BofrAP3-1 | AOC50670.1     | AP3 |
|                                 | BofrPI-1  | AOC50677.1     | PI  |
|                                 | BofrPI-2  | AOC50678.1     | PI  |
|                                 | BofrPI-3  | AOC50679.1     | PI  |
|                                 | BofrPI-4  | AOC50680.1     | PI  |
| Lardizabalaceae                 |           |                |     |
| <i>Akebia trifoliata</i>        | AktAP3-1  | AAT46097.1     | AP3 |
|                                 | AktAP3-2  | AAT46098.1     | AP3 |
|                                 | AktAP3-3  | ABC02398.1     | AP3 |
|                                 | AktPI     | AAT46101.1     | PI  |
| Ranunculaceae                   |           |                |     |
| <i>Aquilegia vulgaris</i>       | AqvAP3-1  | ABP01804.1     | AP3 |
|                                 | AqvAP3-2  | ABP01803.1     | AP3 |
|                                 | AqvAP3-3  | ABP01802.1     | AP3 |
|                                 | AqvPI     | ABP01801.1     | PI  |
| <i>Thalictrum dioicum</i>       | ThdAP3-1  | AAW78033.1     | AP3 |
|                                 | ThdAP3-2a | AAW78034.1     | AP3 |
|                                 | ThdAP3-2b | AAW78035.1     | AP3 |
|                                 | ThdPI-1   | AAW78031.1     | PI  |

|                                 |           |            |     |
|---------------------------------|-----------|------------|-----|
| <i>Nigella damascena</i>        | ThdPI-2   | AAW78032.1 | PI  |
|                                 | NdAP3-1   | ALM95512.1 | AP3 |
|                                 | NdAP3-2   | ALM95513.1 | AP3 |
|                                 | NdAP3-3   | AGH39931.1 | AP3 |
|                                 | NdPI1     | ALM95515.1 | PI  |
|                                 | NdPI2     | ALM95516.1 | PI  |
| Cercidiphyllaceae               |           |            |     |
| <i>Cercidiphyllum japonicum</i> | CejaAP3-1 | ASY97764.1 | AP3 |
|                                 | CejaAP3-2 | ASY97765.1 | AP3 |
|                                 | CejaPI    | ASY97767.1 | PI  |
| Violaceae Batsch                |           |            |     |
| <i>Viola yedoensis Makino</i>   | VpTM6-1   | APQ46143.1 | AP3 |
|                                 | VpTM6-2   | APQ46144.1 | AP3 |
|                                 | VpPI      | APQ46145.1 | PI  |
| Cucurbitaceae                   |           |            |     |
| <i>Cucumis sativus L.</i>       | CsMADS1   | AAX37273.1 | AP3 |
| Fabaceae                        |           |            |     |
| <i>Medicago truncatula</i>      | MtNMH7    | AEW43601.1 | AP3 |
|                                 | MtTM6     | AEW43602.1 | TM6 |
| <i>Lotus japonicus</i>          | LjAP3     | AAX13301.1 | AP3 |
|                                 | LjPIa     | AAX13299.1 | PI  |
|                                 | LjPIb     | AAX13300.1 | PI  |
| Rosaceae                        |           |            |     |
| <i>Eriobotrya japonica</i>      | EjAP3     | QGR27127.1 | AP3 |
|                                 | EjPI      | QGR27129.1 | PI  |
| Malvaceae                       |           |            |     |
| <i>Gossypium hirsutum</i>       | GhMADS53  | AGW23355.1 | AP3 |
|                                 | GhTM6     | ADX60056.1 | TM6 |
|                                 | GhMADS12  | ACJ26767.1 | PI  |
|                                 | GhMADS50  | AGW23352.1 | PI  |
| Caricaceae                      |           |            |     |
| <i>carica papaya</i>            | CpTM6-1   | ABQ51321.1 | TM6 |
|                                 | CpTM6-2   | ABQ51322.1 | TM6 |
|                                 | CpPI      | ABQ51323.1 | PI  |
| Brassicaceae                    |           |            |     |
| <i>Arabidopsis thaliana</i>     | AP3       | AAD51903.1 | AP3 |
|                                 | PI        | BAA06465.1 | PI  |
| Polygonaceae                    |           |            |     |
| <i>Fagopyrum esculentum</i>     | FaesAP3-1 | AFO83616.1 | AP3 |
|                                 | FaesAP3-2 | QLJ83023.1 | AP3 |
|                                 | FaesPI    | AFO83617.1 | PI  |
| Ericaceae                       |           |            |     |
| <i>Rhododendron kaempferi</i>   | RkAP3a    | BBC77405.1 | AP3 |
|                                 | RkPI1-1   | BBA27230.1 | PI  |
|                                 | RkPI1-2   | BBA27231.1 | PI  |
| Pyrolaceae                      |           |            |     |
| <i>Monotropa hypopitys</i>      | MhyAP3    | AQM52302.1 | AP3 |
|                                 | MhyTM6    | AQM52303.1 | TM6 |
|                                 | MhyPI     | AQM52304.1 | PI  |
| Rubiaceae                       |           |            |     |
| <i>Coffea arabica</i>           | CaAP3     | AHW58039.1 | AP3 |
|                                 | CaTM6     | AHW58030.1 | TM6 |

|                              |        |                |     |
|------------------------------|--------|----------------|-----|
|                              | CaPI   | AHW58035.1     | PI  |
| Gentianaceae                 |        |                |     |
| <i>Gentiana scabra</i> Bunge | GsAP3a | BAS04474.1     | AP3 |
|                              | GsAP3b | BAS04479.1     | AP3 |
|                              | GsTM6  | BAS04472.1     | TM6 |
|                              | GsPI1  | BAS04475.1     | PI  |
|                              | GsPI2  | BAS04476.1     | PI  |
|                              | GsPI3  | BAS04478.1     | PI  |
| Solanaceae                   |        |                |     |
| <i>Petunia x hybrida</i>     | PhDEF  | AAQ72510.2     | AP3 |
|                              | PhTM6  | AAS46017.1     | TM6 |
|                              | PhGLO1 | AAS46018.1     | GLO |
| <i>Solanum lycopersicum</i>  | LDEF   | NP_001234077.2 | AP3 |
|                              | TDR6   | NP_001311309.1 | TM6 |
|                              | TPI    | ABG73411.1     | PI  |
| <i>Physalis pubescens</i>    | PFDEF  | AGN54423.1     | AP3 |
|                              | PFTM6  | AGN54424.1     | TM6 |
|                              | PFGLO1 | AGN54427.1     | PI  |
|                              | PFGLO2 | AGN54426.1     | PI  |
| <i>Nicotiana tabacum</i>     | NTDEF  | CAA65288.1     | AP3 |
|                              | NTGLO  | CAA48142.1     | GLO |
| Scrophulariaceae             |        |                |     |
| <i>Antirrhinum majus</i> L   | DEF    | BAI68389.1     | AP3 |
|                              | GLO    | CAA48725.1     | GLO |
| <i>Torenia fournieri</i>     | TfDEF  | BAG24492.1     | AP3 |
|                              | TfGLO  | BAJ15423.1     | GLO |
| Asteraceae                   |        |                |     |
| <i>Gerbera hybrid</i>        | GDEF2  | CAA08803.1     | AP3 |
|                              | GDEF3  | ACV53813.1     | AP3 |
|                              | GDEF1  | CAA08802.1     | TM6 |
|                              | GGLO1  | CAA08804.1     | GLO |

> pFaesAP3\_1

-2295 CGATACGACT CCTACTACGG TTCGTGACCCT CCATGCTTCT GAACTGATCA TGTTTACGAT  
CACTFTPPCA1 GTGANTG10

-2235 TATGTAAAAA ACATAATCAA CTCCACCGTG GTGGGGTTAG TCTTCCACGT AGACTAAGCC  
CAREOSREP1 ACGTATERD1

-2175 AATACATAAG CGATGCATAT ATATGAACGT GACATGAGTA TAAGCATAAA TAATATCATA  
CCAATBOX1 CArG-box ACGTATERD1

-2115 TGATCTTTGG TAATACTCAA AGGATTAAAT ATGCAACATG CTTTCAAAAT CATTATAAGT  
MYCONSENSUSAT CACTFTPPCA1

-2055 CTCAAAATGT TCAAATCATC ATGTCTCAAT ACTTAAATA TCTCAAAAGG TTTCAAACCG  
CAATBOX1

-1995 ATATCATCTC AAAAGTATTAC TCATAACCAT CAAGTGTTTA AAATCAATAT CATCTCGATA  
CACTFTPPCA1 MYBIAT MYCONSENSUSAT CAATBOX1

-1935 ACTCGTAAAC ATCTCAAAAG AGTTCAAAGT CAATCTCATC CAATAACTC GTAATCCAAA  
CAATBOX1 CAATBOX1

-1875 TCTAGTAACA CATCAAAATC AATCTCATCT CAATAACTCG TAATCCAAAT CATGTAACCTC

CAATBOX1 CAATBOX1  
 -1815 ATCAATATCA TCTCAATAAC TCGTAATCCA AATTTATCAG TATAACATAT CTAATGGTCA  
 CAATBOX1 CAATBOX1  
 -1755 ATTGA~~CCGAA~~ATGGGGTAAC AAGGTCGATC CTTGCCCTT TCTCAAATCC ATCATAAAAA  
 LTRE1HVBTL49  
 -1695 TCATCCAAAT CACAATAACAA AATATGCTCG AGCATT~~TTTA~~CTTTATAAAT TGTATTCAAC  
 CAATBOX1 CACTFTPPCA1 TATABOX2  
 -1635 TCACGTGTTT GTATT~~TTATT~~TTAAAACATG TCCAACCCAT GTTGAACACG ATGATACCTC  
 CAREOSREP1 TATABOX5  
 -1575 CTAACCTTGA~~CC~~ATGAGATT CTCACAGCAA~~TC~~ACGGATCA~~AGTG~~CAGTCC TCGTCATCCA  
 WRKY71OS CAATBOX1 MYCONSENSUSAT  
 -1515 CAATGACCGG GCACAACTC GGCCACACA AACTAAGATT ACAACC~~ACTA~~GTGAGCATGA  
 CAATBOX1 CACTFTPPCA1 GTGANTG10  
 -1455 CCCGCCTAAA CCGAGGAGCA TAAAAATCAT GAAACAAAA CGGATGGAAA AT~~ACT~~TCGGT  
 CACTFTPPCA1  
 -1395 GTGGTCATAG ACCAACTCTT CTCTCAATAT AATAGGGCAA ATTGTCCGCT ATTGTCGTAG  
 CAREOSREP1 CAATBOX1  
 -1335 ACCAAATTAT CTCTGTGTC~~ACATA~~AGAAA~~AAAATGCCGC~~TTAAGTCAAA GACCAAATCA  
 TGTACACMCUCUMISIN POLLEN1LELAT52  
 -1275 TCTCAAATCC TCAATATCAA~~TA~~ACCCACTT CTTTCCAAA ATATTTCAAT AAAATTTCTT  
 CAATBOX1 CAATBOX1 CACTFTPPCA1 CAATBOX1  
 -1215 TAATGATCAC AATCAAAATT AACACTTCAC CGCCAATATT GTCAAATCAA CACAAGGCAA  
 CACTFTPPCA1 CCAATBOX1  
 -1155 GTATTCTCAA AGGCTTTTAC~~CA~~AATGACATA TCAAACTCAT~~TT~~CATATTCT CAAACCAAG  
 CAATBOX1 INRNTPSADB MYBIAT  
 -1095 ACAATATCAT TACACTTTCC ATAACTTTCA~~AT~~AACACTT ATCTTTAAAC ATAACAGCGT  
 CAATBOX1 CACTFTPPCA1 CAATBOX1  
 -1035 ATAAAGCATT ACAACTAAAG TGTTATGAAA~~AGT~~CATGACA AAATCAAATA ATATATGGGT  
 -300ELEMENT WRKY71OS  
 -975 TAAAATAGTA GGGGAAAAAT GCCTAAAATG TACTTGTATG~~TG~~AAAAATACA~~AATGT~~GAAAA  
 CACTFTPPCA1 GTGANTG10 MYCONSENSUSAT  
 -915 ACATATTATG GTAATGAAAA AAATAATTA AACTCAGAGA AGATTCGAA AAAAGGACTT  
 -855 AAATGGTGGT TGTGGATGGT AAAACCA~~TTA~~ACTTCTGGCA AGACA~~AAATG~~GATTACAGAAG  
 MYBIAT MYCONSENSUSAT  
 -795 AACCTCAATA AAAATTTGAT CAACTCTACA AAATAATTA CCAACTACAT CATGAATAAA  
 CAATBOX1  
 -735 CAATGGGACG ATCAACGCAT TGATCACTAC ATACACTTTT ACCGATTGAT ATTGTTAAGA  
 CAATBOX1 CACTFTPPCA1 CACTFTPPCA1  
 -675 AAATTAATAA ACATAACCTT CCCATGAAGG AGATAAATGA TAGAATATAA TGGGCAACA  
 POLLEN1LELAT52  
 -615 ATGAGGAAGA GTGGTACTTA TCTTAGTGGC GGAAGCCTTC GCTCTTCGGG AGGGTCTACA  
 MYCONSENSUSAT CACTFTPPCA1

-555 AAAGGCCGCT AGCATTGATG CCACATCCAT TGAGATTACA GGAGACAACT TAATATTCAT

-495 GAACTCGGCC AACCAAATTC AGAAGCCTCC ATGCTAGACA AACATTGACCA ACTCAAATAT  
WRKY71OS

-435 TTCCACCAATG ATCCCGGGTT TTATGCATGA TAACGTGCAA CACATTTCG GGGAAATCAA  
CAATBOX1 ACGTATERD1

-375 CACCGGTTGCT GATCGACTCG CGTTACATGA ACACCAATCCG AATGTTTGACG ACGTTATCAT  
MYBCORE CAATBOX1 WRKY71OS

-315 TTCACATGAT GTTGATGACC TCATCCGAAA AAATGCTATA GGACCTACAA TTTGTAAAA  
MYCONSENSUSAT LTRE1HVBLT49 CAATBOX1

-300ELEMENT

-255 TTGACCGTTT ACTCCTTACC TTGGTCAAAA AAATAAAATA AATAAAAATG TCATGTGTAA  
MYCONSENSUSAT

-195 ACTTACTGCT GCGACATTAT CTAAGCAAAA TATCAGTTTT CCGTCACTGT CTGCCGTTTG  
CACTFTPPCA1 CACTFTPPCA1

-135 ACCGCGAAAA CCATCAAACG GCGTTCCGTC CAATCAATCA AAGCGCTATT GACGACTTCC  
MYB1AT CCAATBOX1

-75 ACTCTTTACA CAGTTAATTG ACGGAAAGTA AATGTGGGAG GGGTTTAAAT ATGGGACTCT  
CACTFTPPCA1 +1

-15 GCAATTGAAA CTTTCATCAA TGCTTCGCAA GGCTTTATTTT TCCATTTGTA GTAACCTCTT  
CAATBOX1 CAATBOX1 TATABOX5

+46 CCTTTTTCTC TCGTTGGAAC TTCAAAGGTG ATCTTGAGTT CAAGCCAAGG GAAGAACTAG  
PYRIMIDINEBOXOSRAMY1A GTGANTG10

+106 AGAGATTGCT AAGGACAACA AGTAACAAA ATG  
GAREAT

**Figure S1: *FaesAP3\_1* promoter sequence.**

The transcription start site (+1) is in bold and boxed. The start codon ATG is in bold and boxed. Putative cis-acting regulatory elements are in bold and underlined.

> *pFaesAP3\_2*

-1401 CAGTAAACCC AGACACATT **T ACT**CCCAAAT TTTTAT**CAAA TG**CCAGCTTC TGAATGGTTT  
CACTFTPPCA1 MYCCONSENSUSAT

-1341 ATGAAGAACA **T TAACTG**CAA TATCGCCT**CA AT**TAAGGGAC TTCCATGGAA CACGATATTT  
MYB2AT CAATBOX1

-1281 ACGTACT**CAA T**CTGGTGGTT GTGGAAGTGG CGGTGTAACC GT**CAAT**GGG GAAAGACAAT  
CAATBOX1 CAATBOX1

-1221 ACTCCTCCCC AGAAGAGTGT AT**TTATCCTC AAT**CAAGCCT CTGA**ACATAT GAATGT****TATT**  
SREATMSD CAATBOX1 MYCCONSENSUSAT TATABOX5

-1161 **T**CGACGGCAA GGAGACTGGG GACT**CAAT**CC CGGAAAGAAG AGGTTTGTAT **CAGCTG**GAGG  
CAATBOX1 MYCCONSENSUSAT

-1101 AGACCACCTT CTGTTTGGGT TAAGTGGAAT TCT**TGAC**GGAG CTGTCAAACA AGGCTGCGGG  
WRKY71OS



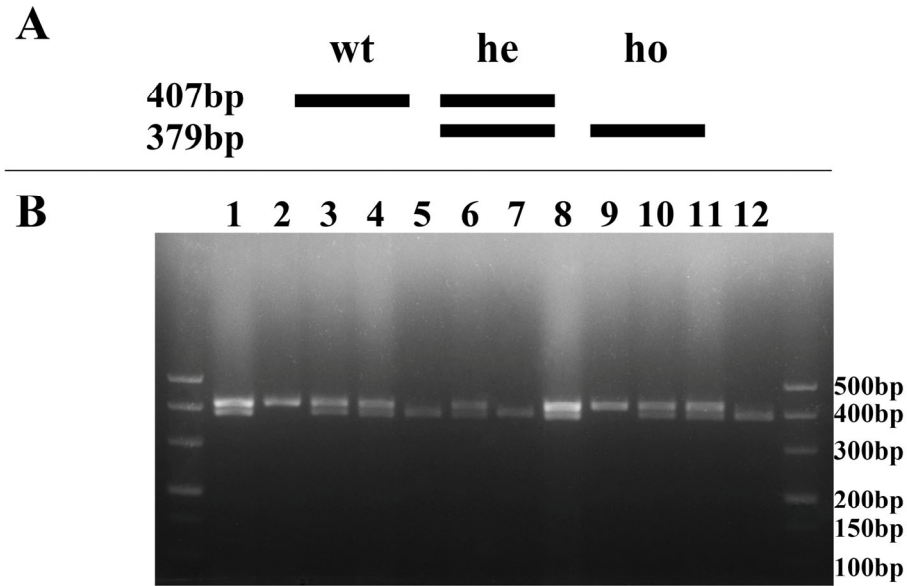

**Figure S3.** Genotyping of wild-type, heterozygous and homozygous *ap3-3* mutant *A. thaliana* by dCAPS. The amplicons from transgenic lines in wild-type background *Arabidopsis* were cleaved by *Cla*I to produce a 407 bp fragment, and the amplicon from heterozygous *AP3/ap3-3* background plants were cleaved by *Cla*I to produce 407 bp and 379 bp fragments; the amplicon from transgenic lines in homozygous *ap3-3* lines were cleaved by *Cla*I to produce a 379 bp fragment.

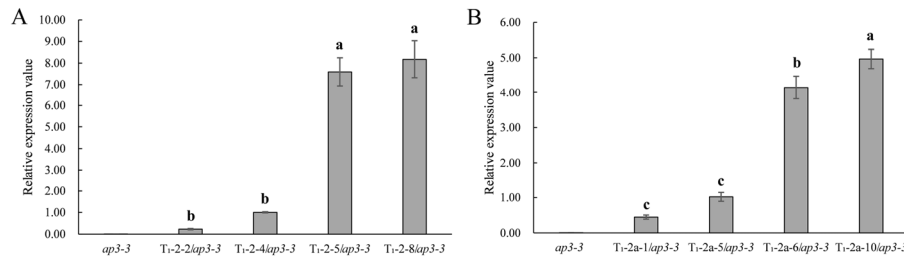

**Figure S4.** Expression of *FaesAP3\_2* and *FaesAP3\_2a* in transgenic *Arabidopsis ap3-3* mutant confirmed by qRT-PCR. (A) Expression of *FaesAP3\_2* in transgenic *Arabidopsis ap3-3* mutant confirmed by qRT-PCR; (B) Expression of *FaesAP3\_2a* in transgenic *Arabidopsis ap3-3* mutant confirmed by qRT-PCR. (*ap3-3*) *Arabidopsis ap3-3* mutant; (T<sub>1</sub>-2-2/*ap3-3*) independent lines of 35S::*FaesAP3\_2* transgenic *Arabidopsis ap3-3* mutant with no phenotype complementation; (T<sub>1</sub>-2-4/*ap3-3*) independent lines of 35S::*FaesAP3\_2* transgenic *Arabidopsis ap3-3* mutant with a weak complement phenotype; (T<sub>1</sub>-2-5/*ap3-3*) independent lines 35S::*FaesAP3\_2* transgenic *Arabidopsis ap3-3* mutant with a medium complement phenotype producing filament attached with carpeloid anther in whorl 3; (T<sub>1</sub>-2-8/*ap3-3*) independent lines 35S::*FaesAP3\_2* transgenic *Arabidopsis ap3-3* mutant with strong complement phenotype rescuing stamen-like organs in the 3rd whorl of flower; (T<sub>1</sub>-2a-1/*ap3-3*) independent lines of 35S::*FaesAP3\_2a* transgenic *Arabidopsis ap3-3* mutant with no phenotype complementation; (T<sub>1</sub>-2a-5/*ap3-3*) independent lines of 35S::*FaesAP3\_2a* transgenic *Arabidopsis ap3-3* mutant with a weak complement phenotype; (T<sub>1</sub>-2a-6/*ap3-3*) independent lines 35S::*FaesAP3\_2a* transgenic *Arabidopsis ap3-3* mutant with a medium complement phenotype producing flower with filament attached with stigmatic papillae or carpeloid anther in whorl 3; (T<sub>1</sub>-2a-10/*ap3-3*) independent lines 35S::*FaesAP3\_2a* transgenic *Arabidopsis ap3-3* mutant with strong complement phenotype rescuing stamen-like organs in the 3rd whorl of flower. Different letters indicate statistically significant differences.
